# Supplementary material for: Construction of 1T@2H MoS2 heterostructures in situ from natural molybdenite with enhanced electrochemical performance for lithium-ion batteries
Source: Royal Society of Chemistry journal article supplement (doi:10.1039/d1ra05565h), 2021-01-01
Supplement: d1ra05565h1.pdf [file d1ra05565h1.pdf]

## Supporting Information

### **Construction of 1T@2H MoS<sub>2</sub> heterostructures in situ from natural molybdenite with enhanced electrochemical performance for lithium-ion batteries**

ChengLong Peng, Mingming Shi, Fei Li, Yang Wang, Xueqin Liu, HuaSheng Liu and Zhen Li\*

*Engineering Research Center of Nano-Geomaterials of Ministry of Education, Faculty of Materials Science and Chemistry, China University of Geosciences, Wuhan, Hubei 430074, P. R. China*

E-mail: zhenli@cug.edu.cn

## Additional figures discussions

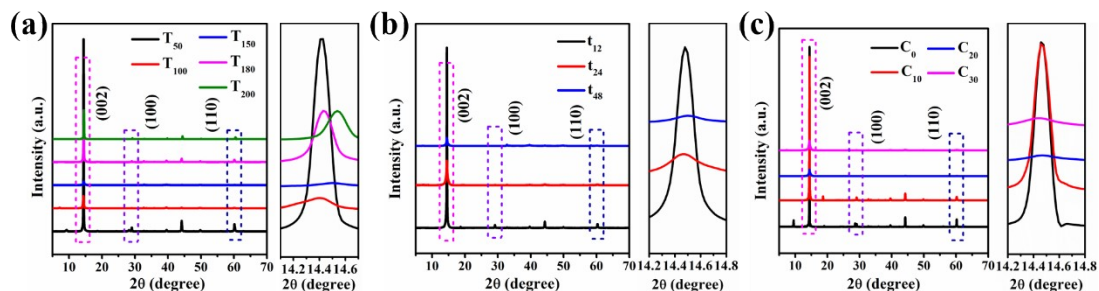

**Fig. S1** XRD patterns of 1T@2H MoS<sub>2</sub> prepared under different conditions: (a) different reaction temperature; (b) different reaction time; (c) different reaction concentrations of sodium hydroxide.

Fig. S1a shows that as the temperature increases, the characteristic peak intensity first increases and then decreases. The characteristic peak intensity is the lowest at 150°C, indicating that the optimal reaction temperature for expansion is 150°C. In addition, the grain size is calculated by the Scherrer formula  $D=K\lambda/(\beta\cos\theta)$ ,  $D_{50}=50.13$  nm,  $D_{100}=24.00$  nm,  $D_{150}=21.35$  nm,  $D_{180}=57.82$  nm,  $D_{200}=49.35$ nm. When the reaction temperature is 150°C, the grain size is the smallest, proving that molybdenite expands most fully under this condition. Similarly, the optimal reaction time is 24 h, and the sodium hydroxide concentration 25 mol L<sup>-1</sup> (Fig. S(b-c) †).

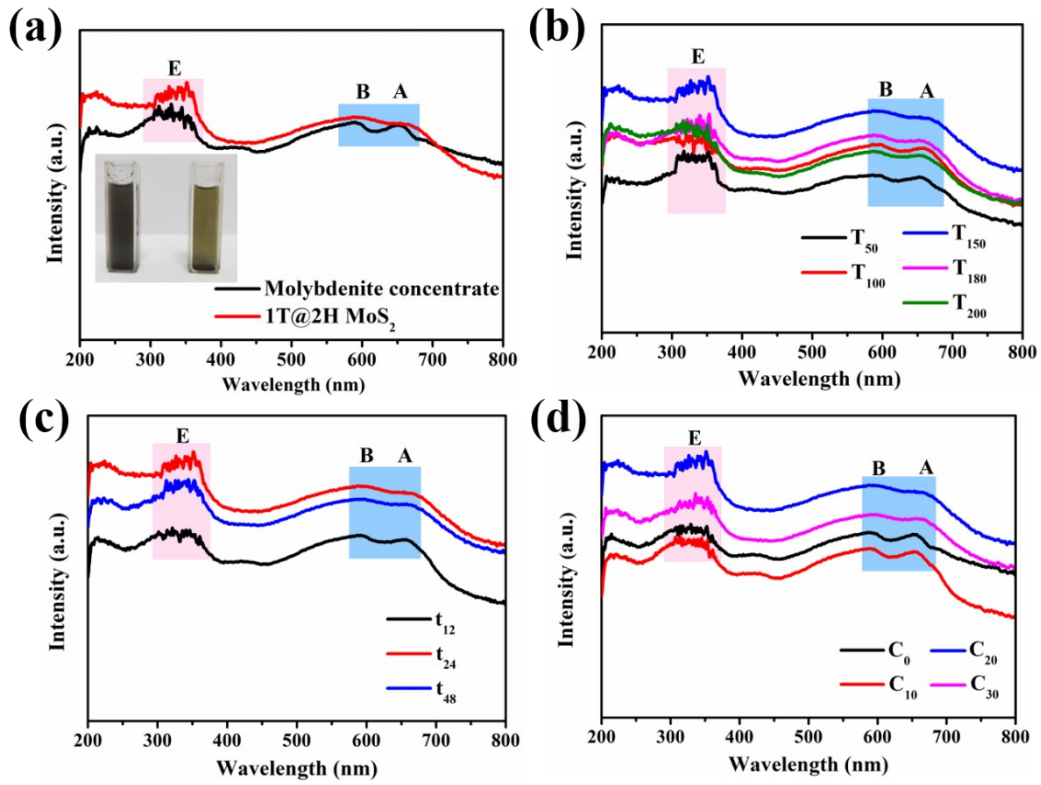

**Fig. S2** UV-Vis absorption spectra: (a) molybdenite concentrate and 1T@2H MoS<sub>2</sub>; (b) the preparation of the 1T@2H MoS<sub>2</sub> at different reaction temperatures; (c) The preparation of the 1T@2H MoS<sub>2</sub> at different reaction time; (d) The preparation of the 1T@2H MoS<sub>2</sub> at different reaction concentrations of sodium hydroxide.

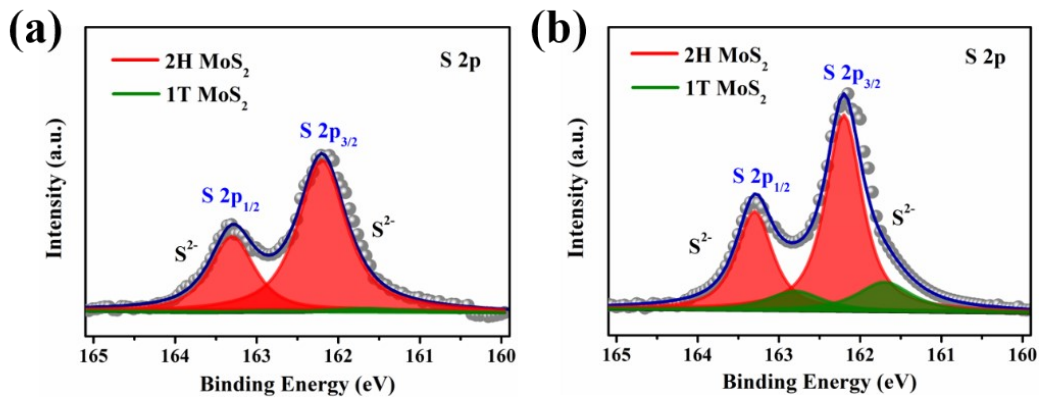

**Fig. S3** (a) S 2p spectra of molybdenite concentrate. (b) S 2p spectra of 1T@2H MoS<sub>2</sub>.

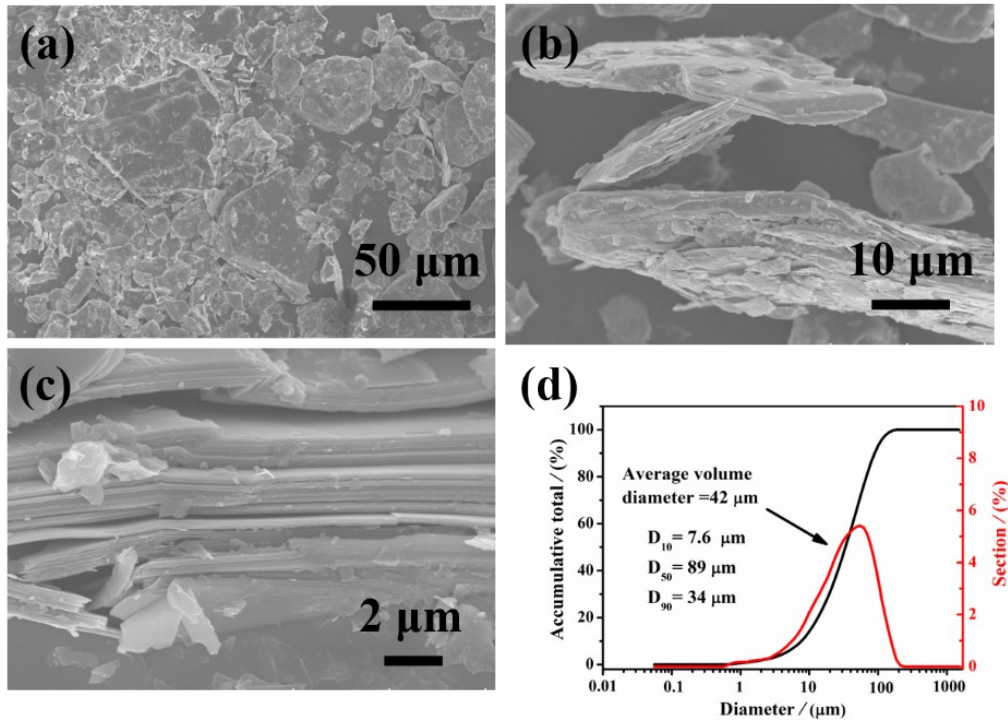

**Fig. S4** (a-c) SEM diagram of molybdenite concentrate. (d) Particle size distribution diagram of molybdenite concentrate.

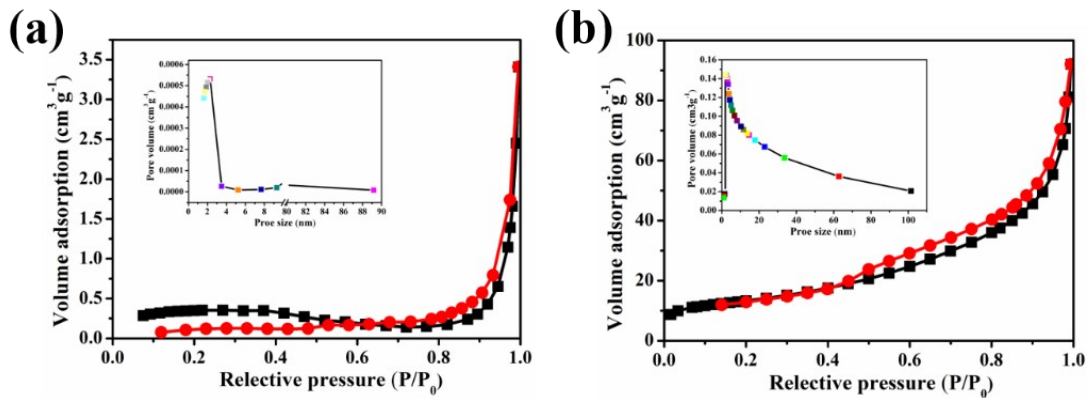

**Fig. S5** N<sub>2</sub> isothermal adsorption-desorption and pore size distribution curve (insert): (a) molybdenite concentrate; (b) 1T@2H MoS<sub>2</sub>.

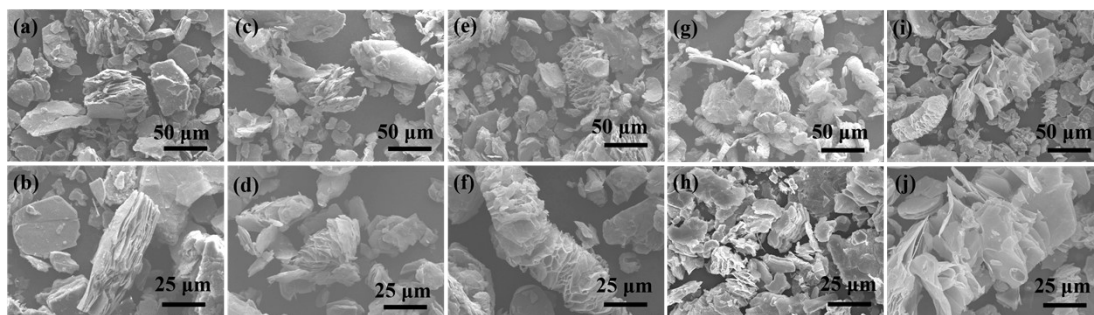

**Fig. S6** 1T@2H MoS<sub>2</sub> prepared at different temperatures: (a-b) 50°C; (c-d) 100°C; (e-f) 150°C; (g-h) 180°C; (i-j) 200°C.

When the reaction temperature was 150 °C, the molybdenite concentrate expanded most fully.

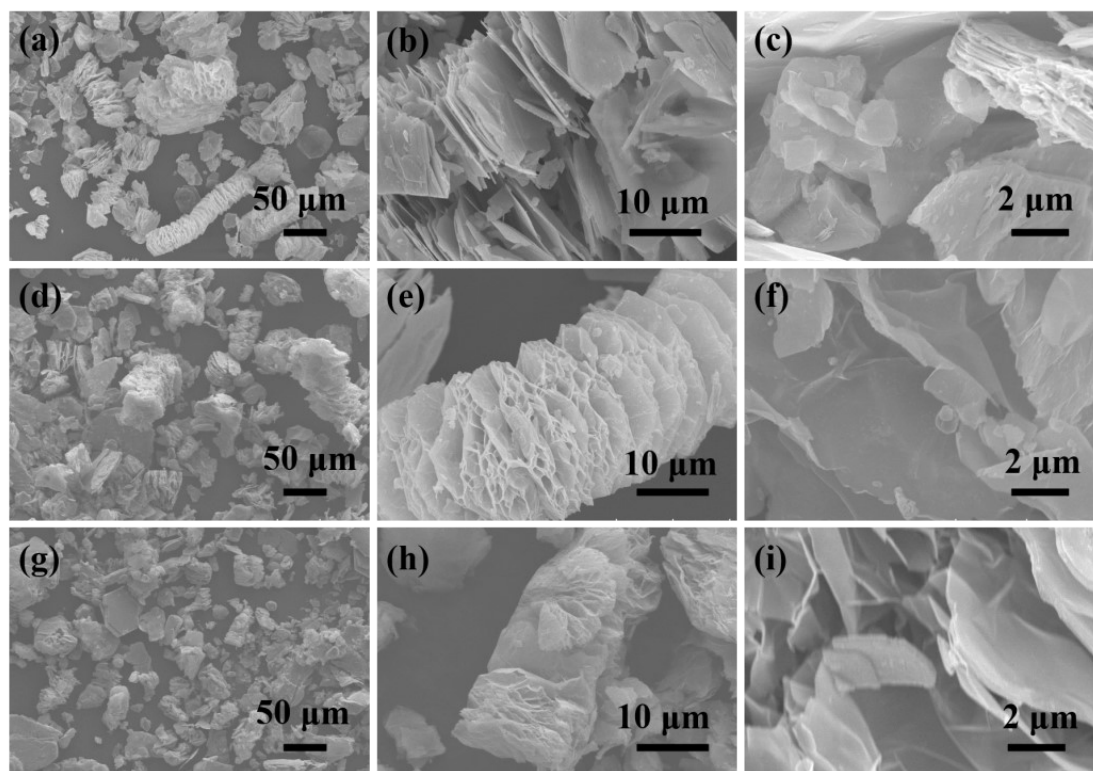

**Fig. S7** 1T@2H MoS<sub>2</sub> prepared at different time: (a-c)12 h; (d-f) 24 h; (g-i) 48 h.

When the reaction time was 24 h, the molybdenite concentrate expanded the most fully.

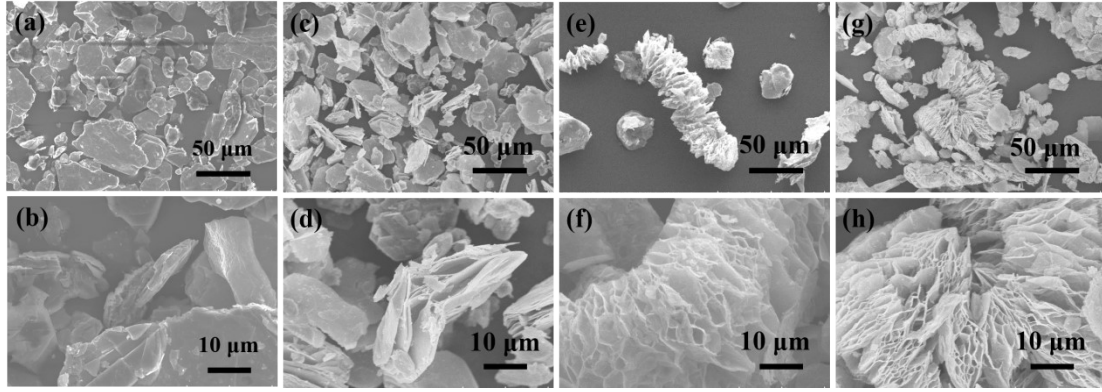

**Fig. S8** 1T@2H MoS<sub>2</sub> prepared at different reaction concentrations of sodium hydroxide: (a-b) 0 mol L<sup>-1</sup>; (c-d) 12.5 mol L<sup>-1</sup>; (e-f) 25 mol L<sup>-1</sup>; (g-h) 37.5 mol L<sup>-1</sup>.

When sodium hydroxide concentration was 25 mol L<sup>-1</sup>, the molybdenite concentrate expanded the most fully.

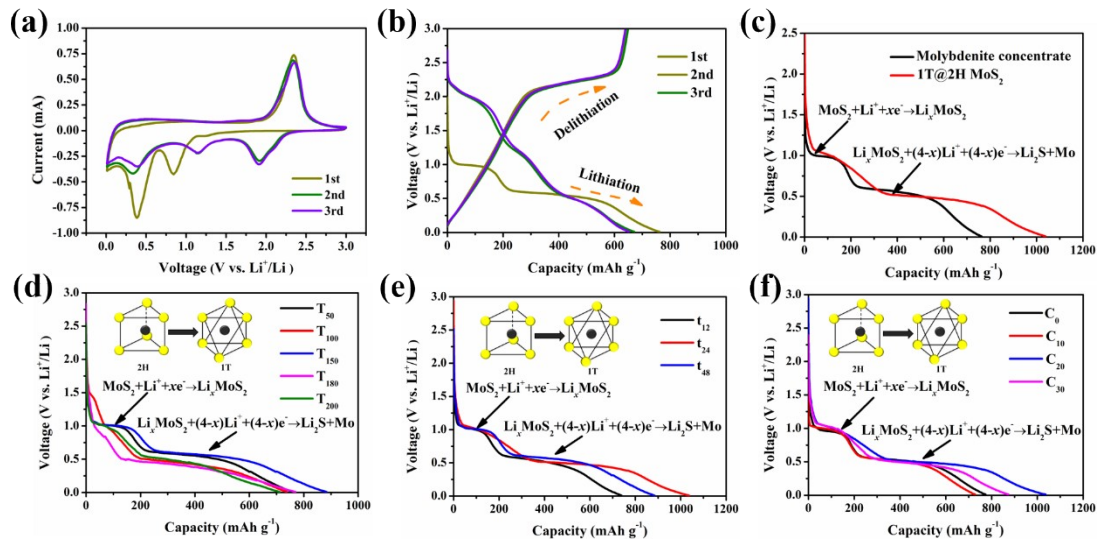

**Fig. S9** (a) CV curves of molybdenite concentrate. (b) Charging and discharging curves of molybdenite concentrate in the first three cycles. (c) The first cycle discharge curves of molybdenite concentrate and 1T@2H MoS<sub>2</sub>. (d) The first cycle discharge curves at different reaction temperatures. (e) The first cycle discharge curves at different reaction time. (f) The first cycle discharge curves of different sodium hydroxide concentrations.



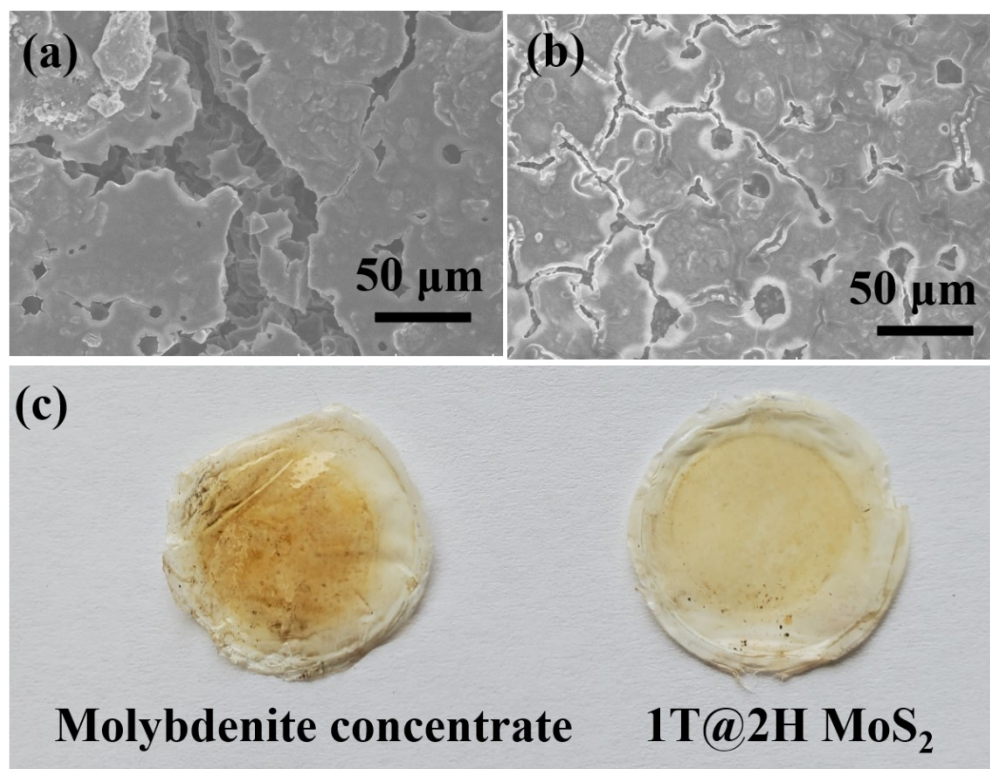

**Fig. S10** (a) SEM images of the molybdenite concentrate. (b) 1T@2H MoS<sub>2</sub> electrode after 120 cycles at a current density of 100 mA g<sup>-1</sup>. (c) Separators color contrast after 120 cycles.

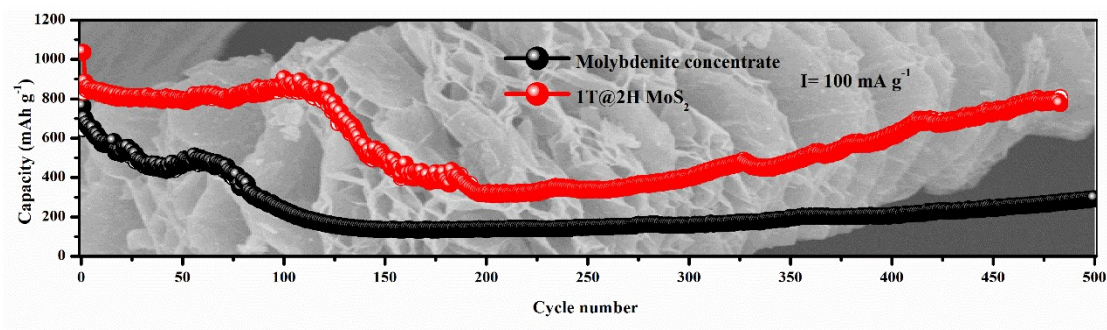

**Fig. S11** Comparison diagram for the long-cycle performance of molybdenite concentrate and 1T@2H MoS<sub>2</sub>.

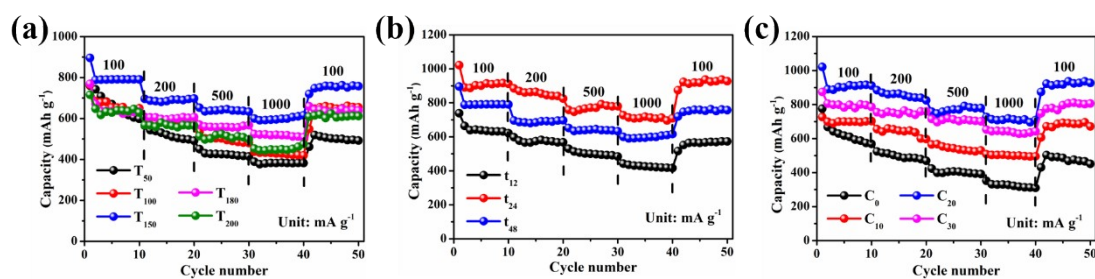

**Fig. S12** 1T@2H MoS<sub>2</sub> rate performances: (a) different reaction temperature; (b) different reaction time; (c) different sodium hydroxide concentrations.

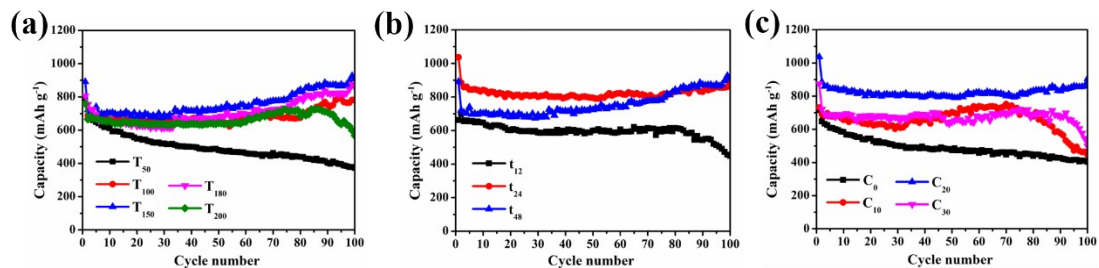

**Fig. S13** Cycling performance of 1T@2H MoS<sub>2</sub>: (a) different reaction temperature; (b) different reaction time; (c) different sodium hydroxide concentrations.

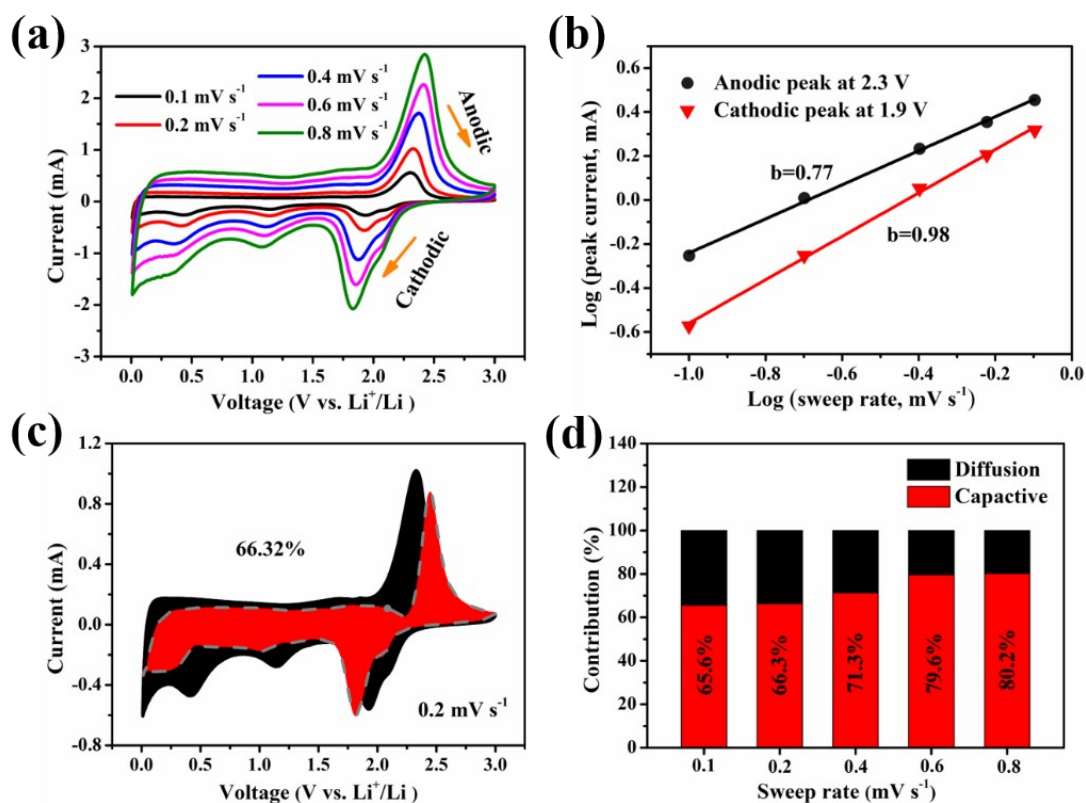

**Fig. S14** Electrochemical kinetics analysis of molybdenite concentrate: (a) CV curves measured at different scan rates from 0.1 to 0.8 mV s<sup>-1</sup>; (b) log(*i*) vs. log(*v*) plots at oxidation and reduction state; (c) CV curve with capacitive and diffusion-controlled contributions at 0.2 mV s<sup>-1</sup>; (d) bar chart showing the contribution ratio of capacitive and diffusion-controlled capacities at different scan rates.



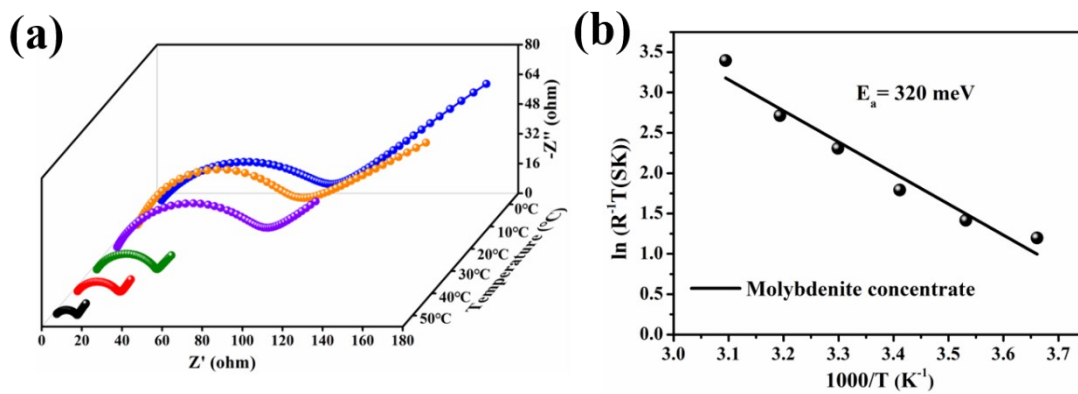

**Fig. S15** (a) Temperature-dependent Nyquist plots of molybdenite concentrate. (b) Reciprocal bulk and interface impedance as a function of the reciprocal temperature of molybdenite concentrate.

**Table S1** Sample number of 1T @2H MoS<sub>2</sub> prepared under different conditions.

| Reaction conditions                  | Sample number    | Detailed parameter       |
|--------------------------------------|------------------|--------------------------|
| Temperature (°C)                     | T <sub>50</sub>  | 50°C                     |
|                                      | T <sub>100</sub> | 100°C,                   |
|                                      | T <sub>150</sub> | 150°C,                   |
|                                      | T <sub>180</sub> | 180°C,                   |
|                                      | T <sub>200</sub> | 200°C                    |
| Time (h)                             | t <sub>12</sub>  | 12 h                     |
|                                      | t <sub>24</sub>  | 24 h                     |
|                                      | t <sub>48</sub>  | 48 h                     |
| Concentration (mol L <sup>-1</sup> ) | C <sub>0</sub>   | 0 mol L <sup>-1</sup>    |
|                                      | C <sub>10</sub>  | 12.5 mol L <sup>-1</sup> |
|                                      | C <sub>20</sub>  | 25 mol L <sup>-1</sup>   |
|                                      | C <sub>30</sub>  | 37.5 mol L <sup>-1</sup> |

**Table S2** The electronic conductivity of molybdenite concentrate and 1T@2H MoS<sub>2</sub> at the different reactions.

| Sample number               | The resistivity ( $\Omega\cdot\text{cm}$ ) | Electrical conductivity (s/cm)    |
|-----------------------------|--------------------------------------------|-----------------------------------|
| Molybdenite concentrate     | Over More than a range $>5\times 10^5$     | Over More than a range $<10^{-5}$ |
| Commercial MoS <sub>2</sub> | $4.52\times 10^{-4}$                       | $2.21\times 10^{-4}$              |
| T <sub>50</sub>             | 88070                                      | $1.13\times 10^{-5}$              |
| T <sub>100</sub>            | 2                                          | 0.5                               |
| T <sub>150</sub>            | 0.2                                        | 5                                 |
| T <sub>180</sub>            | 0.9                                        | 1.111                             |
| T <sub>200</sub>            | 1.4                                        | 0.714                             |
| t <sub>12</sub>             | 10.2                                       | $9.8\times 10^{-2}$               |
| t <sub>24</sub>             | 0.1                                        | 10                                |
| t <sub>48</sub>             | 0.2                                        | 5                                 |
| C <sub>10</sub>             | 9404                                       | $1.06\times 10^{-4}$              |
| C <sub>20</sub>             | 0.1                                        | 10                                |
| C <sub>30</sub>             | 0.125                                      | 8                                 |

**Table S3** XRF comparative analysis of molybdenite concentrate and 1T@2H MoS<sub>2</sub>.

| Sample name             | Sum. of conc. | Na <sub>2</sub> O | MgO  | Al <sub>2</sub> O <sub>3</sub> | SiO <sub>2</sub> | SO <sub>3</sub> | K <sub>2</sub> O | CaO                            | MnO  | Fe <sub>2</sub> O <sub>3</sub> |
|-------------------------|---------------|-------------------|------|--------------------------------|------------------|-----------------|------------------|--------------------------------|------|--------------------------------|
|                         |               | CuO               | ZnO  | MoO <sub>3</sub>               | RuO <sub>2</sub> | PbO             | Rh               | As <sub>2</sub> O <sub>3</sub> | BaO  | F                              |
| Molybdenite concentrate | 100           |                   | 6.04 | 0.38                           | 12.3             | 35.92           | 0.13             | 0.36                           | 0.04 | 1.14                           |
|                         |               | 0.25              | 0.14 | 41.74                          | 0.13             | 0.07            |                  | 0.06                           | 0.31 | 0.85                           |
| 1T@2H MoS <sub>2</sub>  | 100           | 2.52              | 1.68 | 0.16                           | 0.49             | 42.07           | 0.03             | 0.15                           | 0.03 | 1.18                           |
|                         |               | 0.21              | 0.06 | 50.29                          | 0.15             | 0.06            | 0.82             |                                |      |                                |

**Table S4** Compared lithium-ion storage performances with other reported natural molybdenite, synthetic MoS<sub>2</sub>, and MoS<sub>2</sub> based anode materials.

| Electrode material       | Method                            | Morphology             | Capacity (mAh g <sup>-1</sup> ) after cycles (Y) at (z) current density  | References |
|--------------------------|-----------------------------------|------------------------|--------------------------------------------------------------------------|------------|
| 1T@2H MoS <sub>2</sub>   | Expansion                         | Bukly worm-like        | 788 (485) (0.1 A g <sup>-1</sup> )<br>832 (120) (0.1 A g <sup>-1</sup> ) | This work  |
| Pure natural molybdenite | Flotation (different binders)     | Flakes                 | 234 (100) (0.2 A g <sup>-1</sup> );<br>580 (CMC)                         | 1          |
| PEO/molybdenite          | Exfoliated/<br>Solution Process   | Nanocomposite          | 953 (50) (0.05 A g <sup>-1</sup> )                                       | 2          |
| MoS <sub>2</sub>         | Hydrothermal                      | Nanoflakes             | 780 (40) (0.04 A g <sup>-1</sup> )                                       | 3          |
| MoS <sub>2</sub>         | Impregnation                      | Wire-like Arrays       | 876 (100) (0.1 A g <sup>-1</sup> )                                       | 4          |
| MoS <sub>2</sub>         | Hydrothermal                      | 3D Flower-like Spheres | 947 (50) (0.1 A g <sup>-1</sup> )                                        | 5          |
| MoS <sub>2</sub>         | Hydrothermal                      | Hollow Nanoparticles   | 902 (80) (0.1 A g <sup>-1</sup> )                                        | 6          |
| MoS <sub>2</sub>         | Hydrothermal                      | Worm-like              | 845 (50) (0.1 A g <sup>-1</sup> )                                        | 7          |
| MoS <sub>2</sub> @C/RGO  | Exfoliation /<br>Solution Process | A robust 3D bulky      | 1189 (200) ( 0.2 A g <sup>-1</sup> )                                     | 8          |

## References

1. S. J. Li, H. H. Tang, P. Ge, F. Jiang, J. H. Zhou, C. Y. Zhang, H. S. Hou, W. Sun and X. B. Ji, *ACS Appl. Mater. Interfaces*, 2018, **10**, 6378-6389.
2. J. Xiao, D. Choi, L. Cosimbescu, P. Koech, J. Liu and J. P. Lemmon, *Chem. Mater.*, 2010, **22**, 4522-4524.
3. C. Q. Feng, J. Ma, H. Li, R. Zeng, Z. P. Guo and H. K. Liu, *Mater. Res. Bull.*, 2009, **44**, 1811-1815.
4. H. Liu, D. W. Su, R. F. Zhou, B. Sun, G. X. Wang and S. Z. Qiao, *Adv. Energy Mater.*, 2012, **2**, 970-975.
5. T. Yang, Y. J. Chen, B. H. Qu, L. Mei, D. N. Lei, H. N. Zhang, Q. H. Li and T. H. Wang, *Electrochim. Acta*, 2014, **115**, 165-169.
6. M. Wang, G. D. Li, H. Y. Xu, Y. T. Qian and J. Yang, *ACS Appl. Mater. Interfaces*, 2013, **5**, 1003-1008.
7. H. Y. Wang, B. Y. Wang, D. Wang, L. Lu, J. G. Wang and Q. C. Jiang, *RSC Adv.*, 2015, **5**, 58084-58090.
8. S. C. Li, P. Liu, X. B. Huang, Y. G. Tang and H. Y. Wang, *J. Mater. Chem. A*, 2019, **7**, 10988-10997.



**Table S5** The resistance value, the Warburg factor  $\sigma$  and diffusion coefficient D of molybdenite concentrate and MoS<sub>2</sub> were obtained.

| Electrode           | Molybdenite concentrate | 1T@2H MoS <sub>2</sub> |
|---------------------|-------------------------|------------------------|
| R <sub>e</sub> (Ω)  | 3.36                    | 3.10                   |
| R <sub>ct</sub> (Ω) | 47.25                   | 37.78                  |
| $\sigma$            | 28.16                   | 17.08                  |
| D                   | 2.15×10 <sup>-11</sup>  | 5.81×10 <sup>-11</sup> |

**Table S6** The fitting values of molybdenite concentrate were from the EIS spectrum at different temperatures.

| Component           | Temperature (°C) |       |       |       |       |       |
|---------------------|------------------|-------|-------|-------|-------|-------|
|                     | 0                | 10    | 20    | 30    | 40    | 50    |
| R <sub>e</sub> (Ω)  | 5.13             | 3.61  | 3.24  | 3.07  | 2.79  | 2.06  |
| R <sub>ct</sub> (Ω) | 82.42            | 68.72 | 48.85 | 30.17 | 20.77 | 10.82 |

**Table S7** The fitting values of 1T@2H MoS<sub>2</sub> were from the EIS spectrum at different temperatures.

| Component           | Temperature (°C) |       |       |       |       |       |
|---------------------|------------------|-------|-------|-------|-------|-------|
|                     | 0                | 10    | 20    | 30    | 40    | 50    |
| R <sub>e</sub> (Ω)  | 3.09             | 2.91  | 2.65  | 2.18  | 1.45  | 1.186 |
| R <sub>ct</sub> (Ω) | 64.46            | 48.01 | 38.84 | 29.67 | 20.51 | 10.32 |
